# Supplementary material
Source: HighWire-hosted journal article supplement (https://erj.ersjournals.com/content/55/1/1902093)
Supplement: inline-supplementary-material-1 [file inline-supplementary-material-1.pdf]

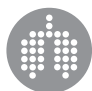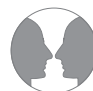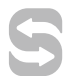

SHAREABLE PDF

# Prognostic significance of chronic respiratory symptoms in individuals with normal spirometry

Ghassan Hamad<sup>1</sup>, Alan Rigby<sup>2</sup> and Alyn H. Morice<sup>1</sup>

**Affiliations:** <sup>1</sup>Hull York Medical School, Castle Hill Hospital, Hull, UK. <sup>2</sup>Hull York Medical School, University of Hull, Castle Hill Hospital, Hull, UK. <sup>3</sup>Hull York Medical School, Castle Hill Hospital, Hull, UK.

**Correspondence:** Ghassan Hamad, University of Hull, Respiratory Medicine Dept, Castle Hill Hospital, Hull, HU6 7RX, UK. E-mail: ghassanhamad@yahoo.co.uk

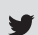

@ERSpublications

**In the presence of normal CXR and examination perhaps FEV<sub>1</sub> is a better diagnostic marker of COPD in primary care** <http://bit.ly/2QAUpSA>

**Cite this article as:** Hamad G, Rigby A, Morice AH. Prognostic significance of chronic respiratory symptoms in individuals with normal spirometry. *Eur Respir J* 2020; 55: 1902093 [<https://doi.org/10.1183/13993003.02093-2019>].

This single-page version can be shared freely online.

## *To the Editor:*

The study by ÇOLAK *et al.* [1] concludes that chronic respiratory symptoms are associated with respiratory hospitalisations and death in individuals with normal spirometry without known airway disease. Whilst guideline-led spirometric diagnostic criteria revolve around the ratio of forced expiratory volume in 1 s (FEV<sub>1</sub>) to forced vital capacity (FVC), in a recent study we concluded that almost a third of patients with a diagnosis of COPD in primary care do not meet those criteria [2]. Whilst a proportion of those could be due to poor spirometry technique, FVC is a difficult manoeuvre to perform. Our study supports the finding of ÇOLAK *et al.* [1] in that airflow obstruction as defined by FEV<sub>1</sub>/FVC may be a poor diagnostic tool. Two thirds of our patients with normal ratio had abnormal FEV<sub>1</sub> % predicted. In the presence of normal chest radiography and examination, perhaps FEV<sub>1</sub> is a better diagnostic marker of COPD in primary care.
